# Supplementary material for: Novel Copper(II) Complexes with Dipinodiazafluorene Ligands: Synthesis, Structure, Magnetic and Catalytic Properties
Source: MDPI journal article supplement (doi:10.3390/molecules27134072), 2022-06-24
Supplement: s1 [file s1]

# Novel Copper(II) Complexes with Dipinodiazfluorene Ligands: Synthesis, Structure, Magnetic and Catalytic Properties

Iakov S. Fomenko <sup>1</sup>, Medhanie Afewerki <sup>2</sup>, Marko I. Gongola <sup>2</sup>, Eugene S. Vasilyev <sup>3</sup>, Lidia S. Shul'pina <sup>4</sup>,  
Nikolay S. Ikonnikov <sup>4</sup>, Georgiy B. Shul'pin <sup>5,6</sup>, Denis G. Samsonenko <sup>1</sup>, Vadim V. Yanshole <sup>7</sup>,  
Vladimir A. Nadoliny <sup>1</sup>, Alexander N. Lavrov <sup>1</sup>, Alexey V. Tkachev <sup>3</sup> and Artem L. Gushchin <sup>1,\*</sup>

<sup>1</sup> Nikolaev Institute of Inorganic Chemistry, Siberian Branch of Russian Academy of Sciences, 3 Acad. Lavrentiev Ave., Novosibirsk 630090, Russia; fom1-93@mail.ru (I.S.F.); denis@niic.nsc.ru (D.G.S.); spectr@niic.nsc.ru (V.A.N.); lavrov@niic.nsc.ru (A.N.L.)

<sup>2</sup> Department of natural sciences Novosibirsk State University, 1 Pirogova Str., Novosibirsk 630090, Russia; medahaben@gmail.com (M.A.); m.gongola@g.nsu.ru (M.I.G.)

<sup>3</sup> Vorozhtsov Novosibirsk Institute of Organic Chemistry, Siberian Branch of Russian Academy of Sciences, 9 Acad. Lavrentiev Ave., Novosibirsk 630090, Russia; vasilyev@nioch.nsc.ru (E.S.V.); atkachev@nioch.nsc.ru (A.V.T.)

<sup>4</sup> A.N. Nesmeyanov Institute of Organoelement Compounds, Russian Academy of Sciences, ul. Vavilova. 28, Moscow 119991, Russia; shulpina@ineos.ac.ru (L.S.S.); ikonns@ineos.ac.ru (N.S.I.)

<sup>5</sup> N.N. Semenov Federal Research Center for Chemical Physics, Russian Academy of Sciences, ul. Kosygina, 4, Moscow 119991, Russia; gbsh@mail.ru

<sup>6</sup> Chemistry and Physics, Plekhanov Russian University of Economics, Stremyannyi Pereulok, 36, Moscow 117997, Russia

<sup>7</sup> International Tomography Center, Siberian Branch of Russian Academy of Sciences, 3a Institutskaya Str., Novosibirsk 630090, Russia; vadim.yanshole@tomo.nsc.ru

\* Correspondence: gushchin@niic.nsc.ru

## Table of contents

**Figure S1.** Mass spectrum of **1** in CH<sub>3</sub>CN

**Figure S2.** Mass spectrum of **2** in CH<sub>3</sub>CN

**Figure S3.** Mass spectrum of **3** in CH<sub>3</sub>CN

**Figure S4.** Mass spectrum of **4** in CH<sub>3</sub>CN

**Table S1.** Identified signals in the mass spectra of complexes **1-4** in acetonitrile

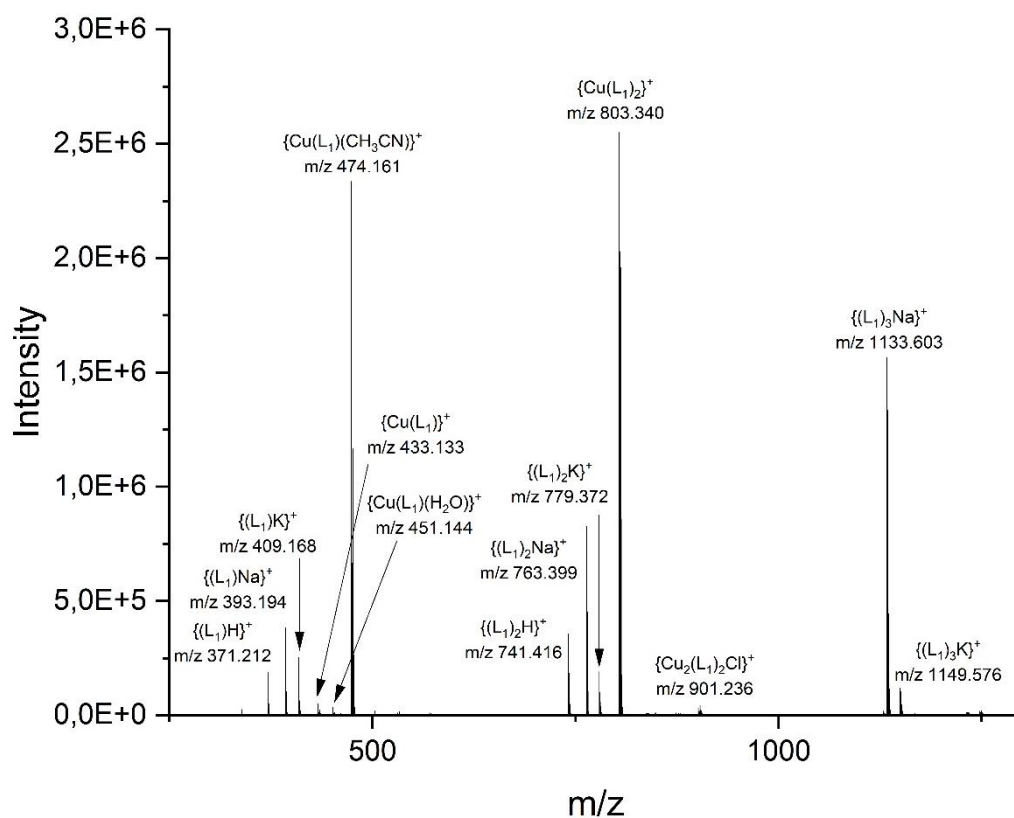

**Figure S1.** Mass spectrum of **1** in  $\text{CH}_3\text{CN}$

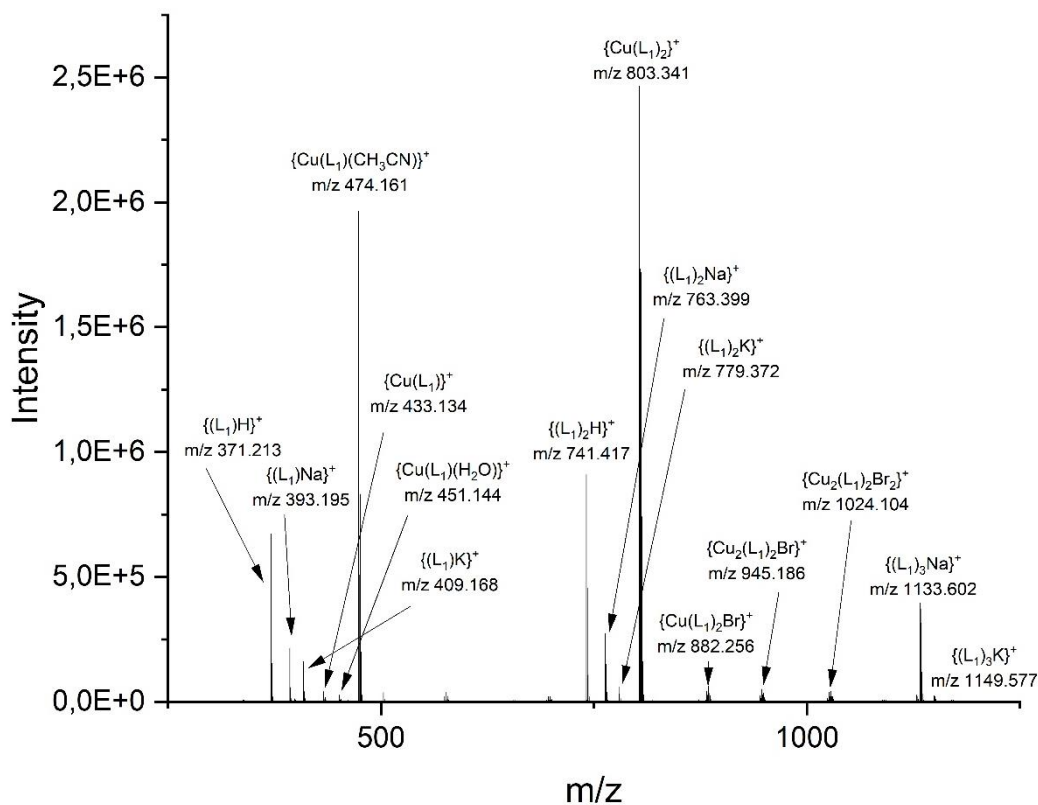

**Figure S2.** Mass spectrum of **2** in  $\text{CH}_3\text{CN}$

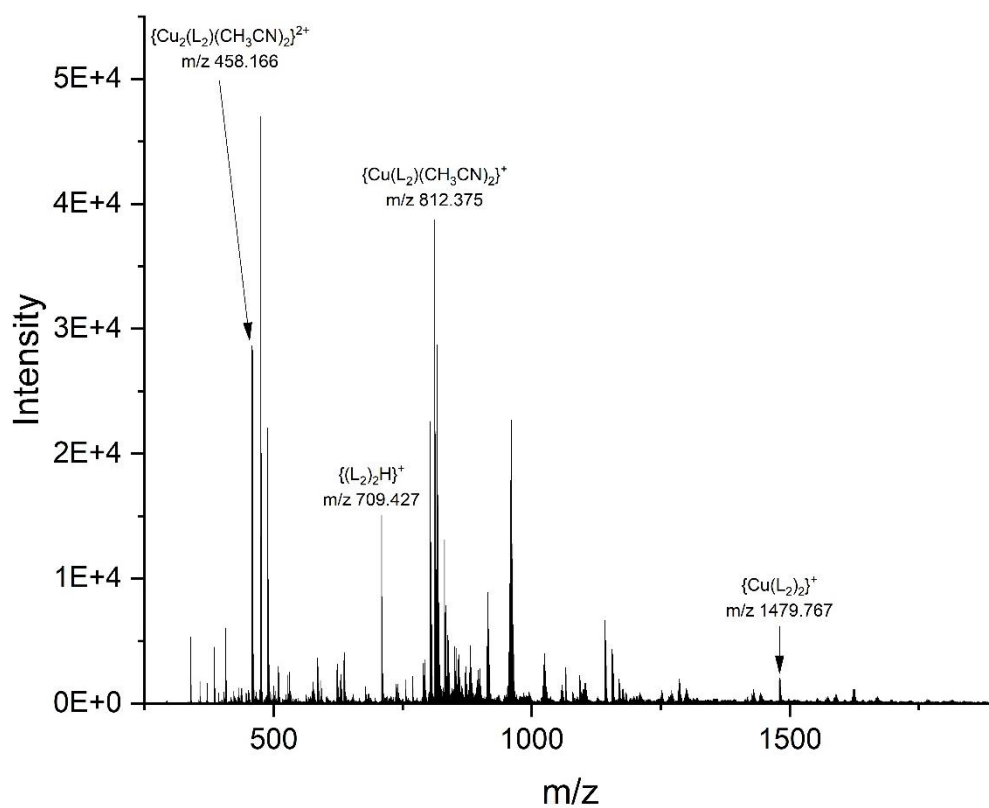

**Figure S3.** Mass spectrum of **3** in  $\text{CH}_3\text{CN}$

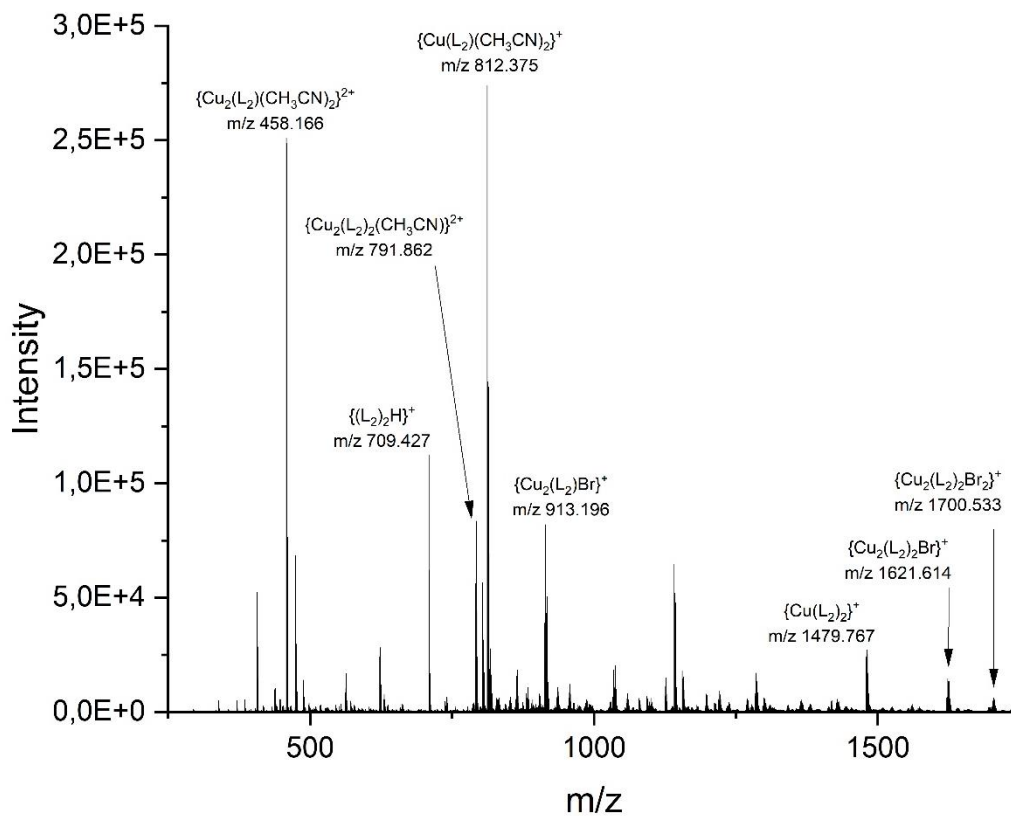

**Figure S4.** Mass spectrum of **4** in  $\text{CH}_3\text{CN}$

**Table S1.** Identified signals in the mass spectra of complexes **1-4** in acetonitrile

| <b>[CuCl<sub>2</sub>L<sub>1</sub>]<sub>2</sub> (1)</b>                                        |                         |                           |                                                                |
|-----------------------------------------------------------------------------------------------|-------------------------|---------------------------|----------------------------------------------------------------|
| <b>Identified chemical formula</b>                                                            | <b>Measured<br/>m/z</b> | <b>Calculated<br/>m/z</b> | <b>Fragment</b>                                                |
| C <sub>25</sub> H <sub>26</sub> N <sub>2</sub> O + H                                          | 371.212                 | 371.212                   | L <sub>1</sub> + H                                             |
| C <sub>25</sub> H <sub>26</sub> N <sub>2</sub> O + Na                                         | 393.194                 | 393.194                   | L <sub>1</sub> + Na                                            |
| C <sub>25</sub> H <sub>26</sub> N <sub>2</sub> O + K                                          | 409.168                 | 409.168                   | L <sub>1</sub> + K                                             |
| C <sub>25</sub> H <sub>26</sub> N <sub>2</sub> O + Cu                                         | 433.133                 | 433.134                   | L <sub>1</sub> + Cu                                            |
| C <sub>25</sub> H <sub>26</sub> N <sub>2</sub> O + Cu + H <sub>2</sub> O                      | 451.144                 | 451.145                   | Cu(L <sub>1</sub> )(H <sub>2</sub> O)                          |
| C <sub>25</sub> H <sub>26</sub> N <sub>2</sub> O + Cu + CH <sub>3</sub> CN                    | 474.161                 | 474.161                   | Cu(L <sub>1</sub> )(CH <sub>3</sub> CN)                        |
| (C <sub>25</sub> H <sub>26</sub> N <sub>2</sub> O) <sub>2</sub> + H                           | 741.416                 | 741.417                   | (L <sub>1</sub> ) <sub>2</sub> + H                             |
| (C <sub>25</sub> H <sub>26</sub> N <sub>2</sub> O) <sub>2</sub> + Na                          | 763.399                 | 763.399                   | (L <sub>1</sub> ) <sub>2</sub> + Na                            |
| (C <sub>25</sub> H <sub>26</sub> N <sub>2</sub> O) <sub>2</sub> + K                           | 779.372                 | 779.373                   | (L <sub>1</sub> ) <sub>2</sub> + K                             |
| (C <sub>25</sub> H <sub>26</sub> N <sub>2</sub> O) <sub>2</sub> + Cu                          | 803.340                 | 803.339                   | (L <sub>1</sub> ) <sub>2</sub> + Cu                            |
| C <sub>50</sub> H <sub>52</sub> Cu <sub>2</sub> N <sub>4</sub> O <sub>2</sub> Cl              | 901.236                 | 901.237                   | Cu <sub>2</sub> (L <sub>1</sub> ) <sub>2</sub> Cl              |
| C <sub>50</sub> H <sub>52</sub> Cu <sub>2</sub> N <sub>4</sub> O <sub>2</sub> Cl <sub>2</sub> | 936.205                 | 936.206                   | Cu <sub>2</sub> (L <sub>1</sub> ) <sub>2</sub> Cl <sub>2</sub> |
| C <sub>50</sub> H <sub>52</sub> Cu <sub>3</sub> N <sub>4</sub> O <sub>2</sub> Cl <sub>2</sub> | 999.133                 | 999.136                   | Cu <sub>3</sub> (L <sub>1</sub> ) <sub>2</sub> Cl <sub>2</sub> |
| (C <sub>25</sub> H <sub>26</sub> N <sub>2</sub> O) <sub>3</sub> + Na                          | 1133.603                | 1133.603                  | (L <sub>1</sub> ) <sub>3</sub> + Na                            |
| (C <sub>25</sub> H <sub>26</sub> N <sub>2</sub> O) <sub>3</sub> + K                           | 1149.576                | 1149.577                  | (L <sub>1</sub> ) <sub>3</sub> + K                             |
| <b>[CuBr<sub>2</sub>L<sub>1</sub>]<sub>2</sub> (2)</b>                                        |                         |                           |                                                                |
| C <sub>25</sub> H <sub>26</sub> N <sub>2</sub> O + H                                          | 371.213                 | 371.212                   | L <sub>1</sub> + H                                             |
| C <sub>25</sub> H <sub>26</sub> N <sub>2</sub> O + Na                                         | 393.195                 | 393.194                   | L <sub>1</sub> + Na                                            |

|                                                                                      |          |          |                                                            |
|--------------------------------------------------------------------------------------|----------|----------|------------------------------------------------------------|
| $\text{C}_{25}\text{H}_{26}\text{N}_2\text{O} + \text{K}$                            | 409.168  | 409.168  | $\text{L}_1 + \text{K}$                                    |
| $\text{C}_{25}\text{H}_{26}\text{N}_2\text{O} + \text{Cu}$                           | 433.134  | 433.134  | $\text{L}_1 + \text{Cu}$                                   |
| $\text{C}_{25}\text{H}_{26}\text{N}_2\text{O} + \text{Cu} + \text{H}_2\text{O}$      | 451.144  | 451.145  | $\text{Cu}(\text{L}_1)(\text{H}_2\text{O})$                |
| $\text{C}_{25}\text{H}_{26}\text{N}_2\text{O} + \text{Cu} + \text{CH}_3\text{CN}$    | 474.161  | 474.161  | $\text{Cu}(\text{L}_1)(\text{CH}_3\text{CN})$              |
| $\text{C}_{25}\text{H}_{26}\text{N}_2\text{OCuBr}$                                   | 512.052  | 512.052  | $\text{Cu}(\text{L}_1)\text{Br}$                           |
| $\text{C}_{25}\text{H}_{26}\text{N}_2\text{OCu}_2\text{Br}$                          | 574.981  | 574.981  | $\text{Cu}_2(\text{L}_1)\text{Br}$                         |
| $\text{C}_{25}\text{H}_{26}\text{N}_2\text{OCu}_2\text{Br}_2$                        | 653.900  | 653.900  | $\text{Cu}_2(\text{L}_1)\text{Br}_2$                       |
| $\text{C}_{25}\text{H}_{26}\text{N}_2\text{OCu}_2\text{Br}_2 + \text{CH}_3\text{CN}$ | 694.926  | 694.926  | $\text{Cu}_2(\text{L}_1)\text{Br}_2(\text{CH}_3\text{CN})$ |
| $(\text{C}_{25}\text{H}_{26}\text{N}_2\text{O})_2 + \text{H}$                        | 741.417  | 741.417  | $(\text{L}_1)_2 + \text{H}$                                |
| $(\text{C}_{25}\text{H}_{26}\text{N}_2\text{O})_2 + \text{Na}$                       | 763.399  | 763.399  | $(\text{L}_1)_2 + \text{Na}$                               |
| $(\text{C}_{25}\text{H}_{26}\text{N}_2\text{O})_2 + \text{K}$                        | 779.372  | 779.373  | $(\text{L}_1)_2 + \text{K}$                                |
| $(\text{C}_{25}\text{H}_{26}\text{N}_2\text{O})_2 + \text{Cu}$                       | 803.341  | 803.339  | $(\text{L}_1)_2\text{Cu}$                                  |
| $\text{C}_{50}\text{H}_{52}\text{CuN}_4\text{O}_2\text{Br}$                          | 882.256  | 882.257  | $\text{Cu}(\text{L}_1)_2\text{Br}$                         |
| $\text{C}_{50}\text{H}_{52}\text{N}_4\text{O}_2\text{Cu}_2\text{Br}$                 | 945.186  | 945.187  | $\text{Cu}_2(\text{L}_1)_2\text{Br}$                       |
| $\text{C}_{50}\text{H}_{52}\text{N}_4\text{O}_2\text{Cu}_2\text{Br}_2$               | 1024.104 | 1024.105 | $\text{Cu}_2(\text{L}_1)_2\text{Br}_2$                     |
| $\text{C}_{50}\text{H}_{52}\text{N}_4\text{O}_2\text{Cu}_3\text{Br}_2$               | 1087.034 | 1087.034 | $\text{Cu}_3(\text{L}_1)_2\text{Br}_2$                     |
| $(\text{C}_{25}\text{H}_{26}\text{N}_2\text{O})_3 + \text{Na}$                       | 1133.602 | 1133.603 | $(\text{L}_1)_3 + \text{Na}$                               |
| $(\text{C}_{25}\text{H}_{26}\text{N}_2\text{O})_3 + \text{K}$                        | 1149.577 | 1149.577 | $(\text{L}_1)_3 + \text{K}$                                |
| $\text{C}_{50}\text{H}_{52}\text{N}_4\text{O}_2\text{Cu}_3\text{Br}_3$               | 1165.952 | 1165.952 | $\text{Cu}_3(\text{L}_1)_2\text{Br}_3$                     |
|                                                                                      |          |          |                                                            |
| <b><math>[(\text{CuCl}_2)_2\text{L}_2]_n</math> (3)</b>                              |          |          |                                                            |
| $(\text{C}_{50}\text{H}_{52}\text{N}_4)\text{Cu}_2(\text{CH}_3\text{CN})_2^{2+}$     | 458.166  | 458.166  | $\text{Cu}_2(\text{L}_2)(\text{CH}_3\text{CN})_2$          |
| $\text{C}_{50}\text{H}_{52}\text{N}_4 + \text{H}$                                    | 709.427  | 709.427  | $\text{L}_2 + \text{H}$                                    |

|                                                                                    |          |          |                                                   |
|------------------------------------------------------------------------------------|----------|----------|---------------------------------------------------|
| $\text{C}_{50}\text{H}_{52}\text{N}_4 + \text{Na}$                                 | 731.408  | 731.409  | $\text{L}_2 + \text{Na}$                          |
| $\text{C}_{50}\text{H}_{52}\text{N}_4\text{Cu}(\text{CH}_3\text{CN})$              | 812.375  | 812.375  | $\text{Cu}(\text{L}_2)(\text{CH}_3\text{CN})$     |
| $(\text{C}_{50}\text{H}_{52}\text{N}_4)_2\text{Cu}$                                | 1479.767 | 1479.767 | $\text{Cu}(\text{L}_2)_2$                         |
|                                                                                    |          |          |                                                   |
| <b><math>[(\text{CuBr}_2)_2\text{L}_2]_n</math> (4)</b>                            |          |          |                                                   |
| $(\text{C}_{50}\text{H}_{52}\text{N}_4)\text{Cu}_2(\text{CH}_3\text{CN})_2^{2+}$   | 458.166  | 458.166  | $\text{Cu}_2(\text{L}_2)(\text{CH}_3\text{CN})_2$ |
| $\text{C}_{50}\text{H}_{52}\text{N}_4 + \text{H}$                                  | 709.427  | 709.427  | $\text{L}_2 + \text{H}$                           |
| $(\text{C}_{50}\text{H}_{52}\text{N}_4)_2\text{Cu}_2(\text{CH}_3\text{CN})_2^{2+}$ | 791.862  | 791.862  | $\text{Cu}_2(\text{L}_2)_2(\text{CH}_3\text{CN})$ |
| $\text{C}_{50}\text{H}_{52}\text{N}_4\text{Cu}(\text{CH}_3\text{CN})$              | 812.375  | 812.375  | $\text{Cu}(\text{L}_2)(\text{CH}_3\text{CN})$     |
| $(\text{C}_{50}\text{H}_{52}\text{N}_4)\text{Cu}_2\text{Br}$                       | 913.196  | 913.197  | $\text{Cu}_2(\text{L}_2)\text{Br}$                |
| $(\text{C}_{50}\text{H}_{52}\text{N}_4)\text{Cu}_3\text{Br}_2$                     | 1055.043 | 1055.044 | $\text{Cu}_3(\text{L}_2)\text{Br}_2$              |
| $(\text{C}_{50}\text{H}_{52}\text{N}_4)_2\text{Cu}$                                | 1479.767 | 1479.767 | $\text{Cu}(\text{L}_2)_2$                         |
| $(\text{C}_{50}\text{H}_{52}\text{N}_4)_2\text{Cu}_2\text{Br}$                     | 1621.614 | 1621.615 | $\text{Cu}_2(\text{L}_2)_2\text{Br}$              |
| $(\text{C}_{50}\text{H}_{52}\text{N}_4)_2\text{Cu}_2\text{Br}_2$                   | 1700.533 | 1700.534 | $\text{Cu}_2(\text{L}_2)_2\text{Br}_2$            |
